# 1 HydDB: A web tool for hydrogenase 2 classification and analysis

3 Dan Søndergaard<sup>a</sup>, Christian N. S. Pedersen<sup>a</sup>, Chris Greening<sup>c, d \*</sup>

4

5 <sup>a</sup> Aarhus University, Bioinformatics Research Centre, C.F. Møllers Allé 8, Aarhus  
6 DK-8000, Denmark

7 <sup>b</sup> Australian National University, Research School of Chemistry, Sullivans Creek  
8 Road, Acton, ACT 2601, Australia

9 <sup>c</sup> The Commonwealth Scientific and Industrial Research Organisation, Land and  
10 Water Flagship, Clunies Ross Street, Acton, ACT 2060, Australia

11 <sup>d</sup> Monash University, School of Biological Sciences, Clayton, VIC 2800, Australia

12

## 13 **Correspondence:**

14 Dr Chris Greening ([chris.greening@monash.edu](mailto:chris.greening@monash.edu)), Monash University, School of  
15 Biological Sciences, Clayton, VIC 2800, Australia

16 Dan Søndergaard ([das@birc.au.dk](mailto:das@birc.au.dk)), Aarhus University, Bioinformatics Research  
17 Centre, C.F. Møllers Allé 8, Aarhus DK-8000, Denmark

18

19 **Journal:** Scientific Reports

20 **Short Title:** HydDB, a hydrogenase database

21 **Figures:** Two colour figures, two tables

22

## 23 **Abstract**

24 H<sub>2</sub> metabolism is the most ancient and diverse mechanism of energy-generation.  
25 The metalloenzymes mediating this metabolism, hydrogenases, are encoded by over  
26 60 microbial phyla and are present in all major ecosystems. We developed a  
27 classification system and web tool, HydDB, for the structural and functional analysis  
28 of these enzymes. We show that hydrogenase function can be predicted by primary  
29 sequence alone using an expanded classification scheme (comprising 29 [NiFe]-  
30 hydrogenase subgroups, 8 [FeFe]-hydrogenase subtypes, [Fe]-hydrogenases).  
31 Using this scheme, we built a web tool that rapidly and reliably classifies  
32 hydrogenase primary sequences using a combination of *k*-nearest neighbors'  
33 algorithms and CDD referencing. Demonstrating its capacity, the tool reliably  
34 predicted hydrogenase content and function in 12 newly-sequenced bacteria,  
35 archaea, and eukaryotes. HydDB also provides the capacity to browse 3248  
36 annotated sequences and contains a detailed repository of physiological,  
37 biochemical, and structural information about the 38 hydrogenase classes defined  
38 here. The database and classifier are freely and publicly available at  
39 <http://services.birc.au.dk/hyddb/>

40

## 41 **Introduction**

42 Microorganisms conserve energy by metabolizing H<sub>2</sub>. Oxidation of this high-energy  
43 fuel yields electrons that can be used for respiration and carbon-fixation. This  
44 diffusible gas is also produced in diverse fermentation and anaerobic respiratory  
45 processes <sup>1</sup>. H<sub>2</sub> metabolism contributes to the growth and survival of microorganisms  
46 across the three domains of life: chemotrophs and phototrophs, lithotrophs and

47 heterotrophs, aerobes and anaerobes, mesophiles and extremophiles alike <sup>1,2</sup>. On  
48 the ecosystem scale, H<sub>2</sub> supports microbial communities in most terrestrial, aquatic,  
49 and host-associated ecosystems <sup>1,3</sup>. It is also generally accepted that H<sub>2</sub> was the  
50 primordial electron donor <sup>4</sup>. In biological systems, metalloenzymes known as  
51 hydrogenases are responsible for oxidizing and evolving H<sub>2</sub> <sup>1,5</sup>. Our recent survey  
52 showed there is a far greater number and diversity of hydrogenases than previously  
53 thought <sup>2</sup>. It is predicted over 55 microbial phyla and up to half of all microorganisms  
54 harbor hydrogenases <sup>2,6</sup>. Better understanding H<sub>2</sub> metabolism and the enzymes that  
55 mediate it also has wider implications, particularly in relation to human health and  
56 disease <sup>3,7</sup>, biogeochemical cycling <sup>8</sup>, and renewable energy <sup>9,10</sup>.

57

58 There are three classes of hydrogenase, the [NiFe], [FeFe], and [Fe] hydrogenases,  
59 that are distinguished by their metal composition. Whereas the [Fe]-hydrogenases  
60 are a small methanogenic-specific family <sup>11</sup>, the [NiFe] and [FeFe] classes are widely  
61 distributed and functionally diverse. They comprise numerous different groups and  
62 subgroups/subtypes with distinct biochemical features (e.g. directionality, affinity,  
63 redox partners, and localization) and physiological roles (i.e. respiration,  
64 fermentation, bifurcation, sensing) <sup>1,5</sup>. For example, while Group 2a and 2b [NiFe]-  
65 hydrogenases share > 35% sequence identity, they have distinct roles as respiratory  
66 uptake hydrogenases and H<sub>2</sub> sensors respectively <sup>12,13</sup>. Building on previous work  
67 <sup>14,15</sup>, we recently created a comprehensive hydrogenase classification scheme  
68 predictive of biological function <sup>2</sup>. This scheme was primarily based on amino acid  
69 sequence phylogeny, but also factored in genetic organization, metal-binding motifs,  
70 and functional information. This analysis identified 22 subgroups (within four groups)

71 of [NiFe]-hydrogenases and six subtypes (within three groups) of [FeFe]-  
72 hydrogenases, each with unique physiological roles <sup>2</sup>.

73

74 In this work, we build on these findings to develop the first web database for the  
75 classification and analysis of hydrogenases. We developed an expanded  
76 classification scheme that captures the full sequence diversity of hydrogenase  
77 enzymes and predicts their biological function. Using this information, we developed  
78 a classification tool based on the *k*-nearest neighbors' (*k*-NN) method. This tool is a  
79 more reliable, efficient, and user-friendly method for hydrogenase classification than  
80 standard approaches involved phylogenetic tree construction, with a precision of  
81 more than 99.8%.

82

## 83 **Results and Discussion**

### 84 **A sequence-based classification scheme for hydrogenases**

85 We initially developed a classification scheme to enable prediction of hydrogenase  
86 function by primary sequence alone. To do this, we visualized the relationships  
87 between all hydrogenases in sequence similarity networks <sup>16</sup>, in which nodes  
88 represent individual proteins and the distances between them reflect BLAST *E*-  
89 values. As reflected by our analysis of other protein superfamilies <sup>17,18</sup>, SSNs allow  
90 robust inference of sequence-structure-function relationships for large datasets  
91 without the problems associated with phylogenetic trees (e.g. long-branch attraction).  
92 Consistent with previous phylogenetic analyses <sup>2,14,15</sup>, this analysis showed the  
93 hydrogenase sequences clustered into eight major groups (Groups 1 to 4 [NiFe]-  
94 hydrogenases, Groups A to C [FeFe]-hydrogenases, [Fe]-hydrogenases), six of  
95 which separate into multiple functionally-distinct subgroups or subtypes at narrower

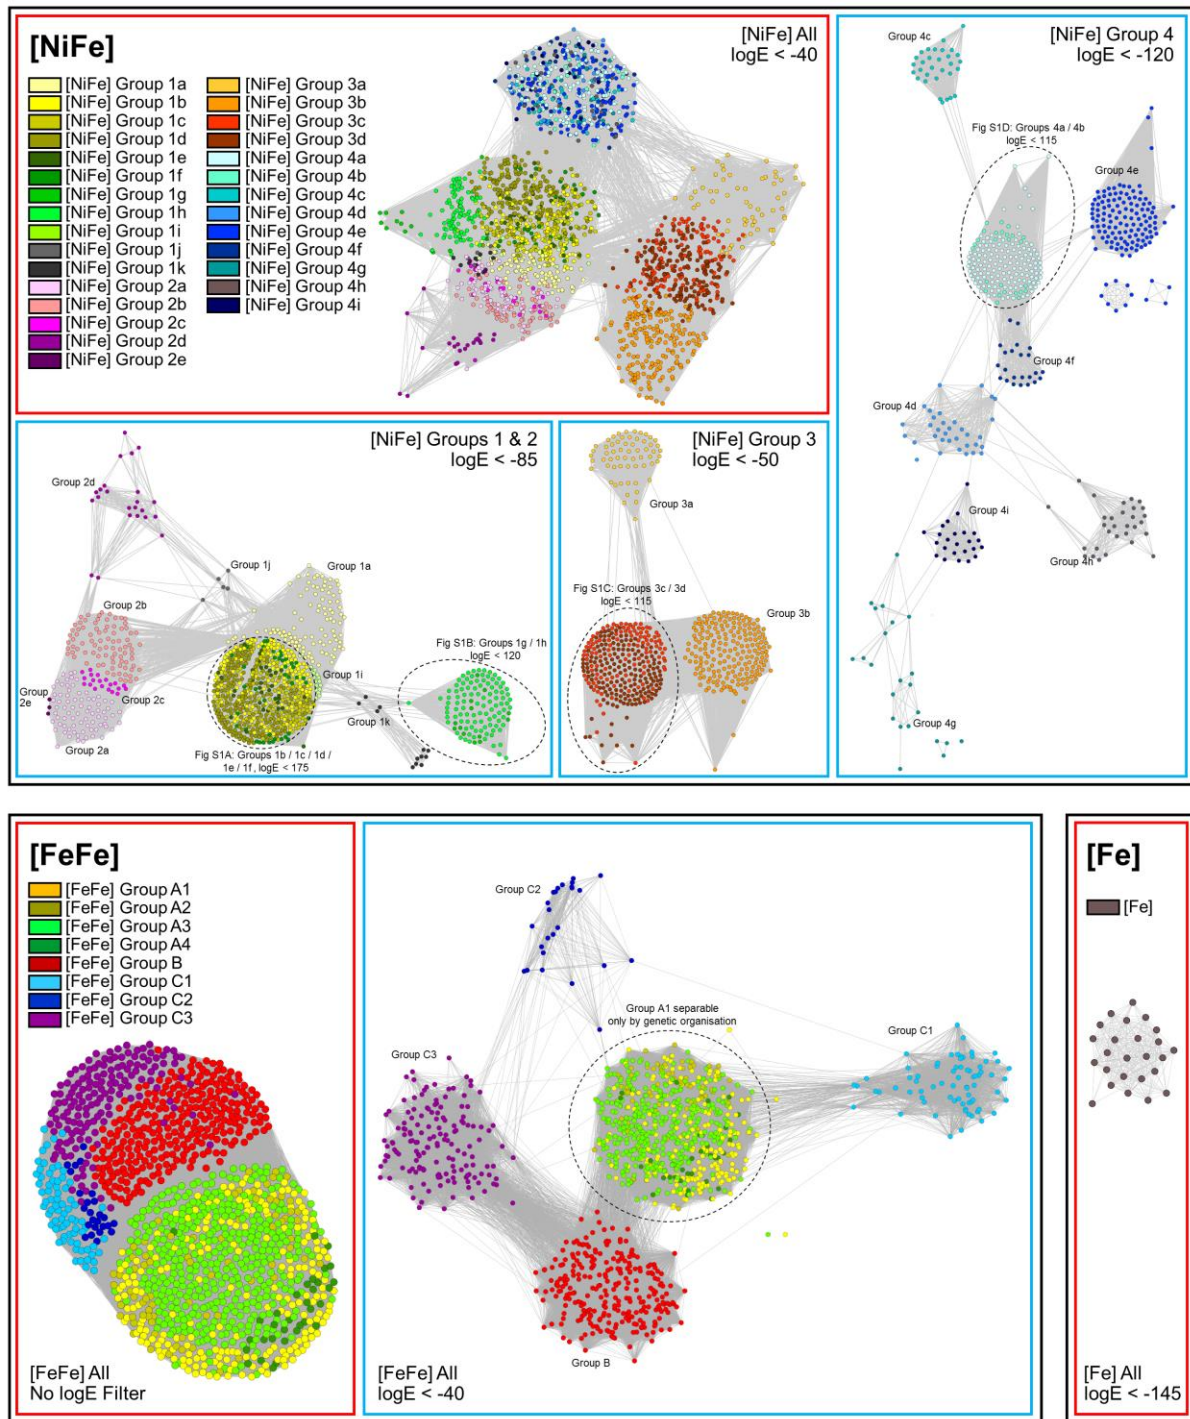

96

97 **Figure 1.** Sequence similarity network of hydrogenase sequences. Nodes represent  
 98 individual proteins and the edges show the BLAST E-values between them at the  
 99 logE filter defined at the bottom-left of each panel. The sequences are colored by  
 100 class as defined in the legends. Figure S1 shows the further delineation of the  
 101 encircled [NiFe] hydrogenase classes.

102 *logE* filters (**Figure 1; Figure S1**). The SSNs demonstrated that all [NiFe]-  
103 hydrogenase subgroups defined through phylogenetic trees in our previous work <sup>2</sup>  
104 separated into distinct clusters, which is consistent with our evolutionary model that  
105 such hydrogenases diverged from a common ancestor to adopt multiple distinct  
106 functions <sup>2</sup>. The only exception were the Group A [FeFe]-hydrogenases, which as  
107 previously-reported <sup>2,15</sup>, cannot be classified by sequence alone as they have  
108 principally diversified through changes in domain architecture and quaternary  
109 structure. It remains strictly necessary to analyze the organization of the genes  
110 encoding these enzymes to determine their specific function, e.g. whether they serve  
111 fermentative or electron-bifurcating roles.

112

113 The SSN analysis revealed that several groups and subgroups that clustered  
114 together in the phylogenetic tree analysis <sup>2</sup> separate into several subclades of  
115 probable distinct function (**Figure 1**). On this basis, we refined and expanded the  
116 hydrogenase classification scheme to reflect the sequence diversification observed  
117 (**Table 1**). Three lineages originally classified as Group 1a [NiFe]-hydrogenases  
118 were reclassified as new subgroups, the Coriobacteria (Group 1i), Archaeoglobi  
119 (Group 1j), and Methanosarcinales (Group 1i). The previously-defined 4b and 4d  
120 subgroups <sup>2</sup> were dissolved, as the SSN analysis confirmed they were highly  
121 polyphyletic. These sequences are reclassified here into five new subgroups: the  
122 formate- and carbon monoxide-respiring Mrp-linked complexes (Group 4b) <sup>19</sup>, the  
123 ferredoxin-coupled Mrp-linked complexes (Group 4d) <sup>20</sup>, the well-described  
124 methanogenic Eha (Group 4h) and Ehb (Group 4i) supercomplexes <sup>21</sup>, and a more  
125 loosely clustered class of unknown function (Group 4g). Three crenarchaeotal  
126 hydrogenases were also classified as their own family (Group 2e); these enzymes

**[NiFe] Group 1: Respiratory H<sub>2</sub>-uptake [NiFe]-hydrogenases**

|           |                               |                                                                                               |           |
|-----------|-------------------------------|-----------------------------------------------------------------------------------------------|-----------|
| <b>1a</b> | Periplasmic                   | Electron input for sulfate, metal, and organohalide respiration. [NiFeSe] variants.           | 2         |
| <b>1b</b> | Prototypical                  | Electron input for sulfate, fumarate, metal, and nitrate respiration.                         | 2         |
| <b>1c</b> | Hyb-type                      | Electron input for fumarate, nitrate, and sulfate respiration. Physiologically reversible.    | 2         |
| <b>1d</b> | Oxygen-tolerant               | Electron input for aerobic respiration and oxygen-tolerant anaerobic respiration.             | 2         |
| <b>1e</b> | Isp-type                      | Electron input primarily for sulfur respiration. Physiologically reversible.                  | 2         |
| <b>1f</b> | Oxygen-protecting             | Unresolved role. May liberate electrons to reduce reactive oxygen species.                    | 2         |
| <b>1g</b> | Crenarchaeota-type            | Electron input primarily for sulfur respiration.                                              | 2         |
| <b>1h</b> | Actinobacteria-type           | Electron input for aerobic respiration. Scavenges electrons from atmospheric H <sub>2</sub> . | 2,40      |
| <b>1i</b> | Coriobacteria-type (putative) | Undetermined role. May liberate electrons for anaerobic respiration.                          | This work |
| <b>1j</b> | Archaeoglobi-type             | Electron input for sulfate respiration <sup>41</sup> .                                        | This work |
| <b>1k</b> | Methanophenazine-reducing     | Electron input for methanogenic heterodisulfide respiration <sup>42</sup> .                   | This work |

**[NiFe] Group 2: Alternative and sensory uptake [NiFe]-hydrogenases**

|           |                                       |                                                                                                       |           |
|-----------|---------------------------------------|-------------------------------------------------------------------------------------------------------|-----------|
| <b>2a</b> | Cyanobacteria-type                    | Electron input for aerobic respiration. Recycles H <sub>2</sub> produced by other cellular processes. | 14        |
| <b>2b</b> | Histidine kinase-linked               | H <sub>2</sub> sensing. Activates two-component system controlling hydrogenase expression.            | 14        |
| <b>2c</b> | Diguanylate cyclase-linked (putative) | Undetermined role. May sense H <sub>2</sub> and regulate processes through cyclic di-GMP production.  | 2         |
| <b>2d</b> | Aquificae-type                        | Unresolved role. May generate reductant for carbon fixation or have a regulatory role.                | 2         |
| <b>2e</b> | Metallosphaera-type (putative)        | Undetermined role. May liberate electrons primarily for aerobic respiration <sup>22</sup> .           | This work |

**[NiFe] Group 3: Cofactor-coupled bidirectional [NiFe]-hydrogenases**

|           |                                  |                                                                                                                                            |    |
|-----------|----------------------------------|--------------------------------------------------------------------------------------------------------------------------------------------|----|
| <b>3a</b> | F <sub>420</sub> -coupled        | Couples oxidation of H <sub>2</sub> to reduction of F <sub>420</sub> during methanogenesis. Physiologically reversible. [NiFeSe] variants. | 14 |
| <b>3b</b> | NADP-coupled                     | Couples oxidation of NADPH to evolution of H <sub>2</sub> . Physiologically reversible. May have sulfhydrogenase activity.                 | 14 |
| <b>3c</b> | Heterodisulfide reductase-linked | Bifurcates electrons from H <sub>2</sub> to heterodisulfide and Fd <sub>ox</sub> in methanogens. [NiFeSe] variants.                        | 14 |
| <b>3d</b> | NAD-coupled                      | Interconverts electrons between H <sub>2</sub> and NAD depending on cellular redox state.                                                  | 14 |

**[NiFe] Group 4: Respiratory H<sub>2</sub>-evolving [NiFe]-hydrogenases**

|           |                           |                                                                                                                                       |           |
|-----------|---------------------------|---------------------------------------------------------------------------------------------------------------------------------------|-----------|
| <b>4a</b> | Formate hydrogenlyase     | Couples formate oxidation to fermentative H <sub>2</sub> evolution. May be H <sup>+</sup> -translocating.                             | 2         |
| <b>4b</b> | Formate-respiring         | Respires formate or carbon monoxide using H <sup>+</sup> as electron acceptor. Na <sup>+</sup> -translocating via Mrp <sup>19</sup> . | This work |
| <b>4c</b> | Carbon monoxide-respiring | Respires carbon monoxide using H <sup>+</sup> as electron acceptor. H <sup>+</sup> -translocating.                                    | 2         |

|                            |                                           |                                                                                                                                                          |           |
|----------------------------|-------------------------------------------|----------------------------------------------------------------------------------------------------------------------------------------------------------|-----------|
| <b>4d</b>                  | Ferredoxin-coupled, Mrp-linked            | Couples Fd <sub>red</sub> oxidation to H <sup>+</sup> reduction. Na <sup>+</sup> -translocating via Mrp complex <sup>20</sup> .                          | This work |
| <b>4e</b>                  | Ferredoxin-coupled, Ech-type              | Couples Fd <sub>red</sub> oxidation to H <sup>+</sup> reduction. Physiologically reversible via H <sup>+</sup> /Na <sup>+</sup> translocation.           | 2         |
| <b>4f</b>                  | Formate-coupled (putative)                | Undetermined role. May couple formate oxidation to H <sub>2</sub> evolution and H <sup>+</sup> translocation.                                            | 2         |
| <b>4g</b>                  | Ferredoxin-coupled (putative)             | Undetermined role. May couple Fd <sub>red</sub> oxidation to proton reduction and H <sup>+</sup> /Na <sup>+</sup> translocation.                         | This work |
| <b>4h</b>                  | Ferredoxin-coupled, Eha-type              | Couples Fd <sub>red</sub> oxidation to H <sup>+</sup> reduction in anaplerotic processes. H <sup>+</sup> /Na <sup>+</sup> -translocating <sup>21</sup> . | This work |
| <b>4i</b>                  | Ferredoxin-coupled, Ehb-type              | Couples Fd <sub>red</sub> oxidation to H <sup>+</sup> reduction in anabolic processes. H <sup>+</sup> /Na <sup>+</sup> -translocating <sup>21</sup> .    | This work |
| <b>[FeFe] Hydrogenases</b> |                                           |                                                                                                                                                          |           |
| <b>A1</b>                  | Prototypical                              | Couples ferredoxin oxidation to fermentative or photobiological H <sub>2</sub> evolution.                                                                | 2,15      |
| <b>A2</b>                  | Glutamate synthase-linked (putative)      | Undetermined role. May couple H <sub>2</sub> oxidation to NAD reduction, generating reductant for glutamate synthase.                                    | 2,15      |
| <b>A3</b>                  | Bifurcating                               | Reversibly bifurcates electrons from H <sub>2</sub> to NAD and Fd <sub>ox</sub> in anaerobic bacteria.                                                   | 2,15      |
| <b>A4</b>                  | Formate dehydrogenase-linked              | Couples formate oxidation to H <sub>2</sub> evolution. Some bifurcate electrons from H <sub>2</sub> to ferredoxin and NADP.                              | 2,15      |
| <b>B</b>                   | Colonic-type (putative)                   | Undetermined role. May couple Fd <sub>red</sub> oxidation to fermentative H <sub>2</sub> evolution.                                                      | 15        |
| <b>C1</b>                  | Histidine kinase-linked (putative)        | Undetermined role. May sense H <sub>2</sub> and regulate processes via histidine kinases <sup>2</sup> .                                                  | This work |
| <b>C2</b>                  | Chemotactic (putative)                    | Undetermined role. May sense H <sub>2</sub> and regulate processes via methyl-accepting chemotaxis proteins <sup>2</sup> .                               | This work |
| <b>C3</b>                  | Phosphatase-linked (putative)             | Undetermined role. May sense H <sub>2</sub> and regulate processes via serine/threonine phosphatases <sup>2</sup> .                                      | This work |
| <b>[Fe] Hydrogenases</b>   |                                           |                                                                                                                                                          |           |
| <b>All</b>                 | Methenyl-H <sub>4</sub> MPT dehydrogenase | Reversibly couples H <sub>2</sub> oxidation to 5,10-methenyltetrahydromethanopterin reduction.                                                           | 14        |

127

128 **Table 1.** Expanded classification scheme for hydrogenase enzymes. The majority of the classes were defined in previous work  
129 <sup>2,14,15,40</sup>. The [NiFe] Group 1i, 1j, 1j, 2e, 4d, 4g, 4h, and 4i enzymes and [FeFe] Groups C1, C2, and C3 enzymes were defined in  
130 this work based on their separation into distinct clusters in the SSN analysis (**Figure 1**). HydDB contains detailed information on  
131 each of these classes, including their taxonomic distribution, genetic organization, biochemistry, and structures, as well a list of  
132 primary references.



133 enable certain crenarchaeotes to grow aerobically on O<sub>2</sub><sup>22,23</sup> and hence may  
134 represent a unique lineage of aerobic uptake hydrogenases currently  
135 underrepresented in genome databases. The Group C [FeFe]-hydrogenases were  
136 also separated into three main subtypes given they separate into distinct clusters  
137 even at relatively broad logE values (**Figure 1**); these enzymes likely have a sensory  
138 role<sup>2,15</sup> and are each co-transcribed with different regulatory elements (**Table 1**).

139

#### 140 **HydDB reliably predicts hydrogenase class using the *k*-NN method and CDD** 141 **referencing**

142 Using this information, we built a web tool to classify hydrogenases. Hydrogenase  
143 classification is determined through a two-step process following input of the catalytic  
144 subunit sequence. In the first, the Conserved Domain Database (CDD)<sup>24</sup> is  
145 referenced to confirm that the inputted sequence has a hydrogenase catalytic  
146 domain, i.e. “Complex1\_49kDa superfamily” (cl21493) (for NiFe-hydrogenases),  
147 “Fe\_hyd\_lg\_C superfamily” (cl14953) (for FeFe-hydrogenases), and “HMD”  
148 (pfam03201) (for Fe-hydrogenases). The sequence is subsequently classified  
149 through the *k*-NN method that determines the most similar sequences listed in the  
150 HydDB reference database. To determine the optimal *k* for the dataset, we  
151 performed a 5-fold cross-validation for *k* = 1...10 and computed the accuracy for  
152 each *k*. The results are shown in **Figure 2**. The classifier predicted the classes of the  
153 3248 hydrogenase sequences with 99.8% accuracy and high robustness when  
154 performing a 5-fold cross-validation (as described in the Methods section) for *k* = 4.  
155 The six sequences where there were discrepancies between the SSN and *k*-NN  
156 predictions are shown in **Table S1**. The classifier has also been trained to detect and

157 exclude protein families that are homologous to hydrogenases but do not metabolize  
158 H<sub>2</sub> (Nuo, Ehr, NARF, HmdII<sup>1,2</sup>) using reference sequences of these proteins.

159

160 **Figure 2.** Evaluation of the  $k$ -NN classifier for  $k = 1 \dots 10$ . For each  $k$ , a 5-fold cross-  
161 validation was performed. The mean accuracy  $\pm$  two standard deviations of the folds  
162 is shown in the figure (note the y-axis).  $k = 1$  provides the most accurate classifier.  
163 However,  $k = 4$  provides almost the same accuracy and is more robust to errors in  
164 the training set (reflected by the lower standard deviation). In general, the standard  
165 deviation is very small, indicating that the predictions are robust to changes in the  
166 training data.

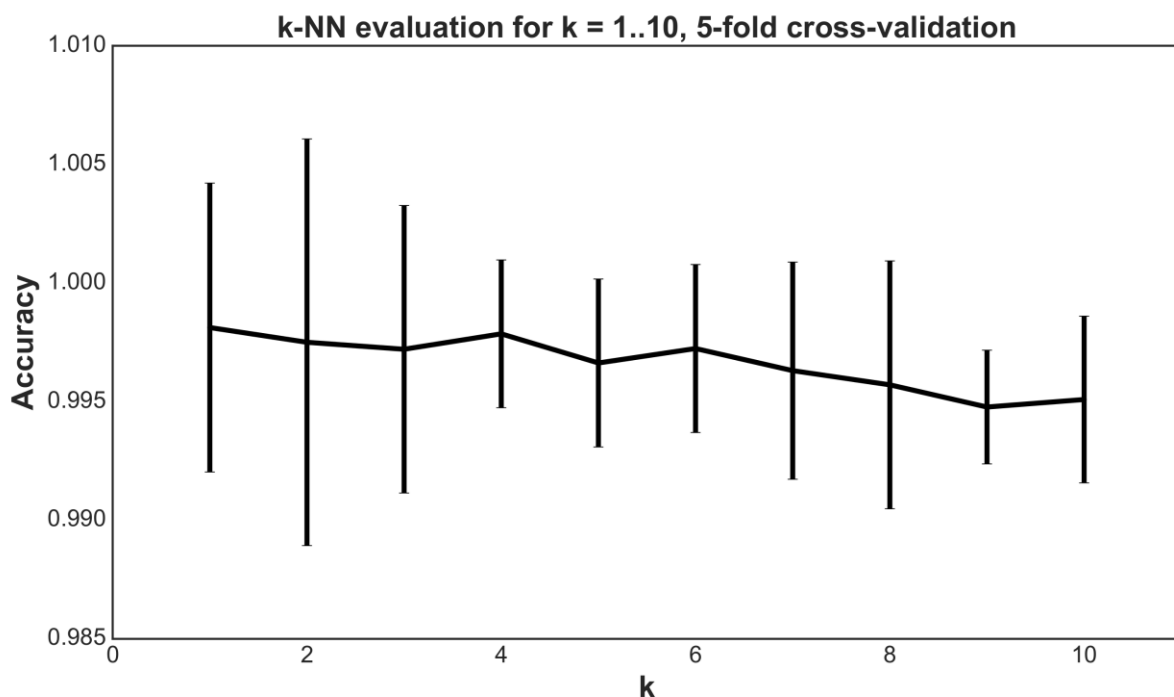

167

168 Sequences of the [FeFe] Group A can be classified into functionally-distinct subtypes  
169 (A1, A2, A3, A4) based on genetic organization<sup>2</sup>. The classifier can classify such  
170 hydrogenases if the protein sequence immediately downstream from the catalytic  
171 subunit sequence is provided. The classifier references the CDD to search for  
172 conserved domains in the downstream protein sequence. A sequence is classified

173 as [FeFe] Group A2 if one of the domains “GltA”, “GltD”, “glutamate synthase small  
174 subunit” or “putative oxidoreductase”, but not “NuoF”, is found in the sequence.  
175 Sequences are classified as [FeFe] Group A3 if the domain “NuoF” is found and  
176 [FeFe] Group A4 if the domain “HycB” is present. If none of the domains are found,  
177 the sequence is classified as A1. These classification rules were determined by  
178 collecting 69 downstream protein sequences. The sequences were then submitted to  
179 the CDD and the domains which most often occurred in each subtype were  
180 extracted.

181

182 In addition to its accuracy, the classifier is superior to other approaches due to its  
183 usability (**Figure S2**). It is accessible as a free web service at  
184 <http://services.birc.au.dk/hyddb/> HydDB allows the users to paste or upload  
185 sequences of hydrogenase catalytic subunit sequences in FASTA format and run the  
186 classification. When analysis has completed, results are presented in a table that  
187 can be downloaded as a CSV file. This provides an efficient and user-friendly way to  
188 classify hydrogenases, in contrast to the previous standard which requires  
189 visualization of multiple sequence alignments in phylogenetic trees <sup>25</sup>.

190

### 191 **HydDB infers the physiological roles of H<sub>2</sub> metabolism**

192 As summarized in **Table 1**, hydrogenase class is strongly correlated with  
193 physiological role. As a result, the classifier is capable of predicting both the class  
194 and function of a sequenced hydrogenase. To demonstrate this capacity, we used  
195 HydDB to analyze the hydrogenases present in 12 newly-sequenced bacteria,  
196 archaea, and eukaryotes of major ecological significance. The classifier correctly  
197 classified all 24 hydrogenases identified in the sequenced genomes, as validated

198 with SSNs (**Table 2**). On the basis of these classifications, the physiological roles of  
199 H<sub>2</sub> metabolism were predicted (**Table 2**). For five of the organisms, these predictions  
200 are confirmed or supported by previously published data <sup>23,26–29</sup>. Other predictions  
201 are in line with metabolic models derived from metagenome surveying <sup>30–32</sup>. In some  
202 cases, the capacity for organisms to metabolize H<sub>2</sub> was not tested or inferred in  
203 previous studies despite the presence of hydrogenases in the sequenced genomes  
204 <sup>27,33–35</sup>.

205

206 While HydDB serves as a reliable initial predictor of hydrogenase class and function,  
207 further analysis is recommended to verify predictions. Hydrogenase sequences only  
208 provide organism with the genetic capacity to metabolise H<sub>2</sub>; their function is  
209 ultimately modulated by their expression and integration within the cell <sup>1,36</sup>. In  
210 addition, some classifications are likely to be overgeneralized due to lack of  
211 functional and biochemical characterization of certain lineages and sublineages. For  
212 example, it is not clear if two distant members of the Group 1h [NiFe]-hydrogenases  
213 (*Robiginitalea biformata*, *Sulfolobus islandicus*) perform the same H<sub>2</sub>-scavenging  
214 functions as the core group <sup>8</sup>. Likewise, it seems probable that the Group 3a [NiFe]-  
215 hydrogenases of *Thermococci* and *Aquificae* use a distinct electron donor to the  
216 main class <sup>37</sup>. Prominent cautions are included in the enzyme pages in cases such  
217 as these. HydDB will be updated when literature is published that influences  
218 functional assignments.

219

## 220 **HydDB contains interfaces for hydrogenase browsing and analyzing**

221 In addition to its classification function, HydDB is designed to be a definitive  
222 repository for hydrogenase retrieval and analysis. The database presently contains

| Organism                               | Phylum                         | Hydrogenase accession no.                                            | HydDB classification                                                     | SSN classification                                                       | Predicted H <sub>2</sub> metabolism                                                                                   | Confirmed H <sub>2</sub> metabolism                                              |
|----------------------------------------|--------------------------------|----------------------------------------------------------------------|--------------------------------------------------------------------------|--------------------------------------------------------------------------|-----------------------------------------------------------------------------------------------------------------------|----------------------------------------------------------------------------------|
| <i>Pyrinomonas methylaliphatogenes</i> | Acidobacteria                  | WP_041979300.1                                                       | [NiFe] Group 1h                                                          | [NiFe] Group 1h                                                          | Persistence by aerobic respiration of atmospheric H <sub>2</sub>                                                      | Confirmed experimentally <sup>26</sup>                                           |
| <i>Phaeodactylibacter xiamenensis</i>  | Bacteroidetes                  | WP_044227713.1<br>WP_044216927.1<br>WP_044227053.1                   | [NiFe] Group 1d<br>[NiFe] Group 2a<br>[NiFe] Group 3d                    | [NiFe] Group 1d<br>[NiFe] Group 2a<br>[NiFe] Group 3d                    | Chemolithoautotrophic growth by aerobic H <sub>2</sub> oxidation                                                      | Bacterium grows aerobically, but H <sub>2</sub> oxidation untested <sup>27</sup> |
| Bathyarchaeota archaeon BA1            | Bathyarchaeota                 | KPV62434.1<br>KPV62673.1<br>KPV62298.1                               | [NiFe] Group 3c<br>[NiFe] Group 3c<br>[NiFe] Group 4g                    | [NiFe] Group 3c<br>[NiFe] Group 3c<br>[NiFe] Group 4g                    | Couples Fd <sub>red</sub> oxidation to H <sub>2</sub> evolution in energy-conserving and bifurcating processes        | Unconfirmed but consistent with metagenome-based models <sup>31</sup>            |
| <i>Lenisia limosa</i>                  | Proteobacteria (Epsilon class) | LenisMan28                                                           | [FeFe] Group A1                                                          | [FeFe] Group A                                                           | Fermentative evolution of H <sub>2</sub>                                                                              | Confirmed experimentally <sup>43</sup>                                           |
| <i>Acidianus copahuensis</i>           | Crenarchaeota                  | WP_048100721.1<br>WP_048100713.1<br>WP_048100378.1<br>WP_048100359.1 | [NiFe] Group 1g<br>[NiFe] Group 1g<br>[NiFe] Group 1h<br>[NiFe] Group 2e | [NiFe] Group 1g<br>[NiFe] Group 1g<br>[NiFe] Group 1h<br>[NiFe] Group 2e | Chemolithoautotrophic growth by H <sub>2</sub> oxidation using O <sub>2</sub> or S <sub>0</sub> as electron acceptors | Partially confirmed experimentally <sup>23</sup>                                 |
| <i>Arcobacter</i> sp. E1/2/3           | Proteobacteria (Epsilon class) | Arc.peg.2312                                                         | [NiFe] Group 1b                                                          | [NiFe] Group 1b                                                          | Chemolithoautotrophic growth by anaerobic H <sub>2</sub> oxidation                                                    | Confirmed experimentally <sup>43</sup>                                           |
| <i>Methanoperedens nitroreducens</i>   | Euryarchaeota (ANME)           | WP_048088262.1<br>WP_048090768.1                                     | [NiFe] Group 3b<br>[NiFe] Group 3b                                       | [NiFe] Group 3b<br>[NiFe] Group 3b                                       | Secondary role for H <sub>2</sub> metabolism limited to fermentative evolution of H <sub>2</sub>                      | Unconfirmed but consistent with metagenome-based models <sup>30</sup>            |
| <i>Kryptonium thompsoni</i>            | Kryptonia                      | CUU03002.1<br>CUU06124.1                                             | [NiFe] Group 1d<br>[NiFe] Group 3b                                       | [NiFe] Group 1d<br>[NiFe] Group 3b                                       | Chemolithoautotrophic growth by aerobic H <sub>2</sub> oxidation, fermentative evolution of H <sub>2</sub> .          | Untested, candidate phylum identified by metagenomics <sup>34</sup>              |
| <i>Lokiarchaeum</i> sp. GC14_75        | Lokiarchaeota                  | KKK40681.1                                                           | [NiFe] Group 3c                                                          | [NiFe] Group 3c                                                          | Bifurcates electrons between H <sub>2</sub> , heterodisulfide, and ferredoxin                                         | Unconfirmed but consistent with metagenome-based models <sup>44</sup>            |

|                             |                   |                          |                                    |                                    |                                                                                                                |                                                                       |
|-----------------------------|-------------------|--------------------------|------------------------------------|------------------------------------|----------------------------------------------------------------------------------------------------------------|-----------------------------------------------------------------------|
| Nitrospira moscoviensis     | Nitrospirae       | WP_053379275.1           | [NiFe] Group 2a                    | [NiFe] Group 2a                    | Chemolithoautotrophic growth by aerobic H <sub>2</sub> oxidation                                               | Confirmed experimentally <sup>28</sup>                                |
| Bacterium GW2011_GWE1_35_17 | Moranbacteria     | KKQ46070.1<br>KKQ45273.1 | [NiFe] Group 1a<br>[NiFe] Group 3b | [NiFe] Group 1a<br>[NiFe] Group 3b | Chemolithoautotrophic growth by anaerobic H <sub>2</sub> oxidation, fermentative evolution of H <sub>2</sub> . | Unconfirmed but consistent with metagenome-based models <sup>32</sup> |
| Bacterium GW2011_GWA2_33_10 | Peregrinibacteria | KKP36897.1               | [FeFe] Group A3                    | [FeFe] Group A                     | Bifurcates electrons between H <sub>2</sub> , NADH, and ferredoxin                                             | Unconfirmed but consistent with metagenome-based models <sup>32</sup> |
| Entotheonella sp. TSY1      | Tectomicrobia     | ETW97737.1<br>ETW94065.1 | [NiFe] Group 1h<br>[NiFe] Group 3b | [NiFe] Group 1h<br>[NiFe] Group 3b | Persistence by aerobic respiration of atmospheric H <sub>2</sub> , fermentative evolution of H <sub>2</sub>    | Untested, candidate phylum identified by metagenomics <sup>35</sup>   |

223

224 **Table 2.** Predictive capacity of the HydDB. HydDB accurately determined hydrogenase content and predicted the physiological roles of H<sub>2</sub>  
225 metabolism in 12 newly-sequenced archaeal and bacterial species.

entries for 3248 hydrogenases, including their NCBI accession numbers, amino acid sequence, hydrogenase class, taxonomic affiliation, and predicted behavior (**Figure S2**). To enable easy exploration of the data set, the database also provides access to an interface for searching, filtering, and sorting the data, as well as the capacity to download the results in CSV or FASTA format. There are individual pages for the 38 hydrogenase classes defined here (**Table 1**), including descriptions of their physiological role, genetic organization, taxonomic distribution, and biochemical features. This is supplemented with a compendium of structural information about the hydrogenases, which is integrated with the Protein Databank (PDB), as well as a library of over 1000 literature references (**Figure S5**).

## Conclusions

To summarize, HydDB is a definitive resource for hydrogenase classification and analysis. The classifier described here provides a reliable, efficient, and convenient tool for hydrogenase classification and functional prediction. HydDB also provides browsing tools for the rapid analysis and retrieval of hydrogenase sequences. Finally, the manually-curated repository of class descriptions, hydrogenase structures, and literature references provide a deep but accessible resource for understanding hydrogenases.

## Materials and Methods

### Sequence datasets

The database was constructed using the amino acid sequences of all curated non-redundant 3248 hydrogenase catalytic subunits represented in the NCBI RefSeq

database in August 2014 <sup>2</sup> (**Dataset S1**). In order to test the classification tool, additional sequences from newly-sequenced archaeal and bacteria phyla were retrieved from the Joint Genome Institute's Integrated Microbial Genomes database <sup>38</sup>.

### **Sequence similarity networks**

Sequence similarity networks (SSNs) <sup>16</sup> were used to visualize the distribution and diversity of the 3248 retrieved hydrogenase sequences. In this analysis, nodes represent individual proteins and edges represent the all-versus-all BLAST  $E$ -values. Three networks were constructed using Cytoscape, namely for the [NiFe]-hydrogenase large subunit sequences, [FeFe]-hydrogenase catalytic domain sequences, and [Fe]-hydrogenase sequences. The relationships between them were viewed at different  $\log E$  cutoffs using different subsets of sequences.

### **Classification method**

The  $k$ -NN method is a well-known machine learning method for classification <sup>39</sup>. Given a set of data points  $x_1, x_2, \dots, x_N$  (e.g. sequences) with known labels  $y_1, y_2, \dots, y_N$  (e.g. type annotations), the label of a point,  $x$ , is predicted by computing the distance from  $x$  to  $x_1, x_2, \dots, x_N$  and extracting the  $k$  labeled points closest to  $x$ , i.e. the neighbors. The predicted label is then determined by majority vote of the labels of the neighbors. The distance measure applied here is that of a BLAST search. Thus, the classifier corresponds to a homology search where the types of the top  $k$  results are considered. However, formulating the classification method as a machine learning problem allows the use of common evaluation methods to estimate the accuracy of the method and perform model selection. The classifier was evaluated



using  $k$ -fold cross-validation. The dataset is first split in to  $k$  parts of equal size.  $k - 1$  parts (the *training set*) are then used for training the classifier and the labels of the data points in the remaining part (the *test set*) are then predicted. This process, called a *fold*, is repeated  $k$  times. The predicted labels of each fold are then compared to the known labels and an accuracy can be computed.

## Acknowledgements

We thank A/Prof Colin J. Jackson, Dr Hafna Ahmed, Dr Andrew Warden, and Dr Stephen Pearce for their helpful advice and comments regarding this manuscript. This work was supported by a PUMPKin Centre of Excellence PhD Scholarship awarded to DS, an Australian National University PhD Scholarship awarded to FHA, and a CSIRO Office of the Chief Executive Postdoctoral Fellowship awarded to CG.

## Author Contributions

CG and DS designed experiments. DS and CG performed experiments. CG, DS, and CNSP analysed data. CNSP supervised students. CG and DS wrote the paper.

**The authors declare no conflict of interest.**

## References

1. Schwartz, E., Fritsch, J. & Friedrich, B. *H<sub>2</sub>-metabolizing prokaryotes*. (Springer Berlin Heidelberg, 2013).
2. Greening, C. *et al.* Genome and metagenome surveys of hydrogenase diversity indicate H<sub>2</sub> is a widely-utilised energy source for microbial growth and survival. *ISME J.* **10**, 761–777 (2016).

3. Cook, G. M., Greening, C., Hards, K. & Berney, M. in *Advances in Bacterial Pathogen Biology* (ed. Poole, R. K.) **65**, 1–62 (Academic Press, 2014).
4. Lane, N., Allen, J. F. & Martin, W. How did LUCA make a living? Chemiosmosis in the origin of life. *BioEssays* **32**, 271–280 (2010).
5. Lubitz, W., Ogata, H., Rüdiger, O. & Reijerse, E. Hydrogenases. *Chem. Rev.* **114**, 4081–148 (2014).
6. Peters, J. W. *et al.* [FeFe]- and [NiFe]-hydrogenase diversity, mechanism, and maturation. *Biochim. Biophys. Acta - Mol. Cell Res.* (2014). doi:10.1016/j.bbamcr.2014.11.021
7. Carbonero, F., Benefiel, A. C. & Gaskins, H. R. Contributions of the microbial hydrogen economy to colonic homeostasis. *Nat Rev Gastroenterol Hepatol* **9**, 504–518 (2012).
8. Greening, C. *et al.* Atmospheric hydrogen scavenging: from enzymes to ecosystems. *Appl. Environ. Microbiol.* **81**, 1190–1199 (2015).
9. Levin, D. B., Pitt, L. & Love, M. Biohydrogen production: prospects and limitations to practical application. *Int. J. Hydrogen Energy* **29**, 173–185 (2004).
10. Cracknell, J. A., Vincent, K. A. & Armstrong, F. A. Enzymes as working or inspirational catalysts for fuel cells and electrolysis. *Chem. Rev.* **108**, 2439–2461 (2008).
11. Shima, S. *et al.* The crystal structure of [Fe]-Hydrogenase reveals the geometry of the active site. *Science* **321**, 572–575 (2008).
12. Lenz, O. & Friedrich, B. A novel multicomponent regulatory system mediates H<sub>2</sub> sensing in *Alcaligenes eutrophus*. *Proc. Natl. Acad. Sci. U. S. A.* **95**, 12474–12479 (1998).
13. Greening, C., Berney, M., Hards, K., Cook, G. M. & Conrad, R. A soil actinobacterium scavenges atmospheric H<sub>2</sub> using two membrane-associated, oxygen-dependent [NiFe] hydrogenases. *Proc. Natl. Acad. Sci. U. S. A.* **111**, 4257–4261 (2014).
14. Vignais, P. M., Billoud, B. & Meyer, J. Classification and phylogeny of hydrogenases. *FEMS Microbiol. Rev.* **25**, 455–501 (2001).
15. Calusinska, M., Happe, T., Joris, B. & Wilmotte, A. The surprising diversity of clostridial hydrogenases: a comparative genomic perspective. *Microbiology* **156**, 1575–1588 (2010).

16. Atkinson, H. J., Morris, J. H., Ferrin, T. E. & Babbitt, P. C. Using sequence similarity networks for visualization of relationships across diverse protein superfamilies. *PLoS One* **4**, e4345 (2009).
17. Ahmed, F. H. *et al.* Sequence-structure-function classification of a catalytically diverse oxidoreductase superfamily in mycobacteria. *J. Mol. Biol.* **427**, 3554–3571 (2015).
18. Ney, B. *et al.* The methanogenic redox cofactor F<sub>420</sub> is widely synthesized by aerobic soil bacteria. *ISME J.* In press (2016).
19. Kim, Y. J. *et al.* Formate-driven growth coupled with H<sub>2</sub> production. *Nature* **467**, 352–5 (2010).
20. McTernan, P. M. *et al.* Intact functional fourteen-subunit respiratory membrane-bound [NiFe]-hydrogenase complex of the hyperthermophilic archaeon *Pyrococcus furiosus*. *J. Biol. Chem.* **289**, 19364–19372 (2014).
21. Lie, T. J. *et al.* Essential anaplerotic role for the energy-converting hydrogenase Eha in hydrogenotrophic methanogenesis. *Proc. Natl. Acad. Sci. U. S. A.* **109**, 15473–8 (2012).
22. Auernik, K. S. & Kelly, R. M. Physiological versatility of the extremely thermoacidophilic archaeon *Metallosphaera sedula* supported by transcriptomic analysis of heterotrophic, autotrophic, and mixotrophic growth. *Appl. Environ. Microbiol.* **76**, 931–935 (2010).
23. Giaveno, M. A., Urbietta, M. S., Ulloa, J. R., González Toril, E. & Donati, E. R. Physiologic versatility and growth flexibility as the Main characteristics of a novel thermoacidophilic *Acidianus* strain isolated from Copahue geothermal area in Argentina. *Microb. Ecol.* **65**, 336–346 (2012).
24. Marchler-Bauer, A. & Bryant, S. H. CD-Search: protein domain annotations on the fly. *Nucleic Acids Res.* **32**, W327–31 (2004).
25. Berney, M., Greening, C., Hards, K., Collins, D. & Cook, G. M. Three different [NiFe] hydrogenases confer metabolic flexibility in the obligate aerobe *Mycobacterium smegmatis*. *Environ. Microbiol.* **16**, 318–330 (2014).
26. Greening, C. *et al.* Persistence of the dominant soil phylum *Acidobacteria* by trace gas scavenging. *Proc. Natl. Acad. Sci.* **112**, 10497–10502 (2015).

27. Chen, Z. *et al.* *Phaeodactylibacter xiamenensis* gen. nov., sp. nov., a member of the family *Saprospiraceae* isolated from the marine alga *Phaeodactylum tricornutum*. *Int. J. Syst. Evol. Microbiol.* **64**, 3496–3502 (2014).
28. Koch, H. *et al.* Growth of nitrite-oxidizing bacteria by aerobic hydrogen oxidation. *Science* **345**, 1052–1054 (2014).
29. Carere, C. R. *et al.* Growth and persistence of methanotrophic bacteria by aerobic hydrogen respiration. *Proc. Natl. Acad. Sci. U. S. A.* (2016).
30. Haroon, M. F. *et al.* Anaerobic oxidation of methane coupled to nitrate reduction in a novel archaeal lineage. *Nature* **500**, 567–70 (2013).
31. Evans, P. N. *et al.* Methane metabolism in the archaeal phylum *Bathyarchaeota* revealed by genome-centric metagenomics. *Science* **350**, 434–438 (2015).
32. Brown, C. T. *et al.* Unusual biology across a group comprising more than 15% of domain *Bacteria*. *Nature* **523**, 208–211 (2015).
33. Spang, A. *et al.* Complex archaea that bridge the gap between prokaryotes and eukaryotes. *Nature* **521**, 173–179 (2015).
34. Eloe-Fadrosh, E. A. *et al.* Global metagenomic survey reveals a new bacterial candidate phylum in geothermal springs. *Nat Commun* **7**, (2016).
35. Wilson, M. C. *et al.* An environmental bacterial taxon with a large and distinct metabolic repertoire. *Nature* **506**, 58–62 (2014).
36. Greening, C. & Cook, G. M. Integration of hydrogenase expression and hydrogen sensing in bacterial cell physiology. *Curr. Opin. Microbiol.* **18**, 30–8 (2014).
37. Greening, C. *et al.* Physiology, biochemistry, and applications of F<sub>420</sub>- and F<sub>o</sub>-dependent redox reactions. *Microbiol. Mol. Biol. Rev.* **80**, 451–493 (2016).
38. Markowitz, V. M. *et al.* IMG: the integrated microbial genomes database and comparative analysis system. *Nucleic Acids Research* **40**, D115–22 (2012).
39. Cover, T. & Hart, P. Nearest neighbor pattern classification. *IEEE Trans. Inf. Theory* **13**, (1967).

40. Constant, P., Chowdhury, S. P., Pratscher, J. & Conrad, R. Streptomyces contributing to atmospheric molecular hydrogen soil uptake are widespread and encode a putative high-affinity [NiFe]-hydrogenase. *Environ. Microbiol.* **12**, 821–829 (2010).
41. Stetter, K. O. *Archaeoglobus fulgidus* gen. nov., sp. nov.: a new taxon of extremely thermophilic archaeobacteria. *Syst. Appl. Microbiol.* **10**, 172–173 (1988).
42. Deppenmeier, U. & Blaut, M. Analysis of the *vhoGAC* and *vhtGAC* operons from *Methanosarcina mazei* strain Gö1, both encoding a membrane-bound hydrogenase and a cytochrome b. *Eur. J. Biochem.* **269**, 261–269 (1995).
43. Hamann, E. *et al.* Environmental *Breviatea* harbour mutualistic *Arcobacter* epibionts. *Nature* **534**, 254–258 (2016).
44. Sousa, F. L., Neukirchen, S., Allen, J. F., Lane, N. & Martin, W. F. Lokiarchaeon is hydrogen dependent. *Nat. Microbiol.* **1**, 16034 (2016).

## Supporting Information

**Figure S1.** Sequence similarity networks showing the relationships between closely related subgroups of [NiFe]-hydrogenases as narrow logE filters.

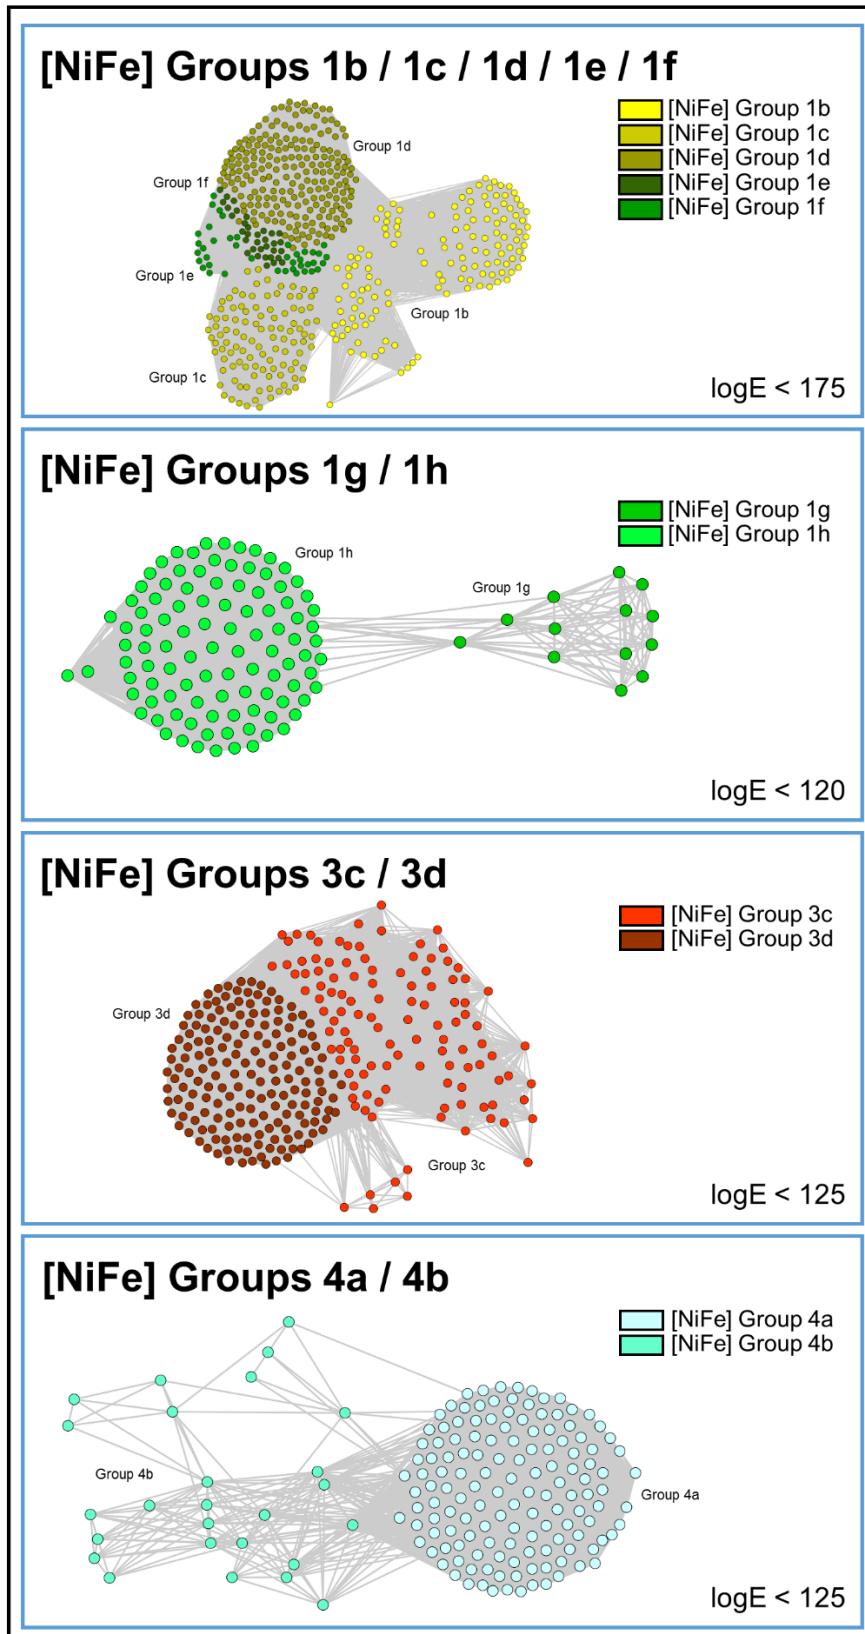

**Figure S2.** Screenshot showing interface of HydDB classification page.

HydDB Classify Browse Information Pages

## Classify

HydDB provides access to an accurate classifier for hydrogenase sequences and a curated database of hydrogenases by known type. The service is provided by the School of Biological Sciences, Monash University and the Bioinformatics Research Centre, Aarhus University.

### Classify

**Sequences**

**Sequences File**

No file chosen

Check sequences using CDD?  
If enabled, HydDB will use CDD to check whether the submitted sequences encode catalytic subunits of putative before classification. Since this step is time-consuming, you may want to uncheck this option if you are certain your sequences encode hydrogenase catalytic subunits.

**Mail**

If an e-mail address is provided, a mail will be sent when the job succeeds or fails.

### Instructions

To use the classifier to predict the type of one or more hydrogenases from sequence, either:

- paste your FASTA-formatted protein sequences into the text area, or
- upload a FASTA-formatted file with your protein sequences.

Press the "Submit" button to upload the sequences and begin the classification.

If you provided an e-mail address you will receive an e-mail when your job finishes or fails including a link to the results. You will also be able to download the results as a CSV file.

Only sequences encoding the catalytic subunits of hydrogenases will be classified, i.e. those binding the [NiFe]-centre (NiFe-hydrogenases), [FeFe]-centre (FeFe-hydrogenases), or [Fe]-centre (Fe-hydrogenases). Electron-transfer subunits, accessory proteins, and maturation factors cannot be classified by this service.

### Limits

A job can at most run for 2 hours. This should be enough for about 2500 sequences to be classified. Results will be stored for 2 weeks. However, we recommend to download the results as they may be deleted due to the rare event of a power outage or server crash.

### Statistics

|                                           |     |
|-------------------------------------------|-----|
| Jobs completed in total                   | 40  |
| Sequences classified in total             | 232 |
| Jobs completed in the last 24 hours       | 0   |
| Sequences classified in the last 24 hours | 0   |

**Figure S3.** Screenshot showing the information provided in the data entry pages for 3248 individual hydrogenases in HydDB.

HydDB
Classify
Browse
Information Pages ▾

  

## Entry WP\_004030875.1

|                                |                             |
|--------------------------------|-----------------------------|
| Phylum                         | Euryarchaeota               |
| Order                          | Methanobacteriales          |
| Organism                       | Methanobacterium formicicum |
| Hydrogenase                    | <a href="#">[Fe]</a>        |
| Activity (Predicted)           | Bidirectional               |
| Oxygen Tolerance (Predicted)   | Tolerant                    |
| Subunits (Predicted)           | 1                           |
| Metal Centres (Predicted)      | Fe ion                      |
| Accessory Subunits (Predicted) | None                        |

```

MKLAILGAGCYRTHAASGITNFSRACEVAEQVGKPEIAMTHSTIAMGAEKELAGIDEIVVSDPVFDNDFTVIDDFEYEAVIEAHKDPESIMPQIREKVNVAKDLKPKPPKG
AIHFTHPEDLGFVTTDDNEAVQDADWMTWFPKGDMMQMGIIKEFADNLKEGAILTHACTVPTTFQKIFEDLSSDEMNIAPKVNVSYPHGAVPEMKGGVYIAEGYASEDAI
CKLVDWGVAAARGDAFKLPAELLPVCDMCSALTAITYAGILSYRDSVMNIIILGAPAGFAQWIAKESLTQVTDLMNSVGDHMEKLDPGALLGTADSMNFGAAADVLPVLEVL
ENRKGKGP TCNI
            
```



**Figure S4.** Screenshot showing the capacity for browsing hydrogenase data entries in HydDB.

| NCBI Accession | Organism                               | Hydrogenase Class | Phylum        | Order              | Activity (Predicted) | Oxygen Tolerance (Predicted) | Subunits (Predicted) | Metal Centres (Predicted) | Accessory Subunits (Predicted) |
|----------------|----------------------------------------|-------------------|---------------|--------------------|----------------------|------------------------------|----------------------|---------------------------|--------------------------------|
| WP_004030875.1 | Methanobacterium formicum              | [Fe]              | Euryarchaeota | Methanobacteriales | Bidirectional        | Tolerant                     | 1                    | Fe ion                    | None                           |
| WP_012955328.1 | Methanobrevibacter ruminantium         | [Fe]              | Euryarchaeota | Methanobacteriales | Bidirectional        | Tolerant                     | 1                    | Fe ion                    | None                           |
| WP_019263574.1 | Methanobrevibacter smithii             | [Fe]              | Euryarchaeota | Methanobacteriales | Bidirectional        | Tolerant                     | 1                    | Fe ion                    | None                           |
| WP_016357634.1 | Methanobrevibacter sp. AbM4            | [Fe]              | Euryarchaeota | Methanobacteriales | Bidirectional        | Tolerant                     | 1                    | Fe ion                    | None                           |
| WP_013296316.1 | Methanothermobacter marburgensis       | [Fe]              | Euryarchaeota | Methanobacteriales | Bidirectional        | Tolerant                     | 1                    | Fe ion                    | None                           |
| WP_010876766.1 | Methanothermobacter thermautotrophicus | [Fe]              | Euryarchaeota | Methanobacteriales | Bidirectional        | Tolerant                     | 1                    | Fe ion                    | None                           |
| WP_013413799.1 | Methanothermus fervidus                | [Fe]              | Euryarchaeota | Methanobacteriales | Bidirectional        | Tolerant                     | 1                    | Fe ion                    | None                           |

**Figure S5.** Screenshot showing the detailed content of the information pages about each hydrogenase class on HydDB. Equivalent information pages are available for all 38 hydrogenase classes defined in this work (**Table 1**).

## [NiFe] Group 1h-hydrogenase

This entry was last updated at: June 13, 2016, 11:11 a.m.

|                  |                                                                                                                                                                                                                                        |
|------------------|----------------------------------------------------------------------------------------------------------------------------------------------------------------------------------------------------------------------------------------|
| Properties       |                                                                                                                                                                                                                                        |
| Group            | [NiFe] Group 1: Respiratory H <sub>2</sub> -uptake [NiFe] hydrogenases                                                                                                                                                                 |
| Subgroup         | [NiFe] Group 1h: Actinobacteria-type                                                                                                                                                                                                   |
| Function         | Hydrogenotrophic respiration using O <sub>2</sub> as terminal electron acceptor. Enzyme scavenges electrons from atmospheric H <sub>2</sub> to fuel respiratory chain during carbon-starvation. Route of electron transfer unresolved. |
| Activity         | H <sub>2</sub> -uptake (unidirectional, high-affinity)                                                                                                                                                                                 |
| Oxygen tolerance | O <sub>2</sub> -tolerant or O <sub>2</sub> -insensitive                                                                                                                                                                                |
| Localisation     | Membrane-associated?                                                                                                                                                                                                                   |

|                        |                                                                                                              |
|------------------------|--------------------------------------------------------------------------------------------------------------|
| Distribution           |                                                                                                              |
| Ecosystem distribution | Upland soils, plant tissues, possibly surface waters                                                         |
| Taxonomic distribution | Widespread among obligately aerobic soil bacteria, especially Actinobacteria, Acidobacteria, and Chloroflexi |

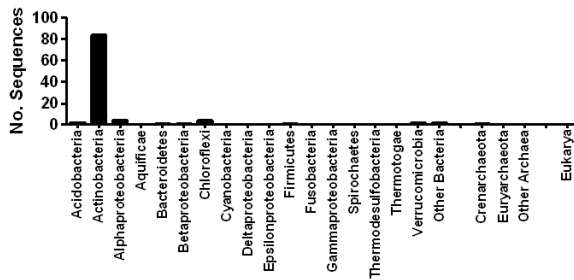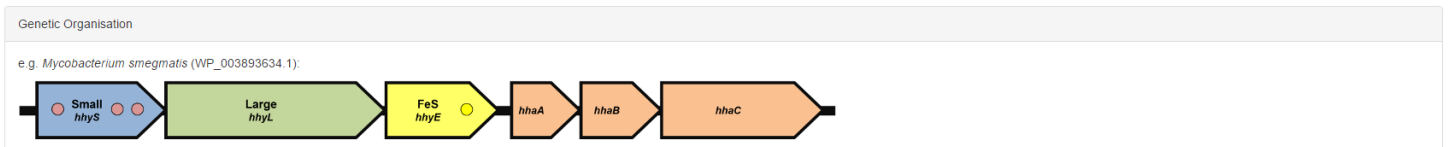

|                     |                                                                                                                                                       |
|---------------------|-------------------------------------------------------------------------------------------------------------------------------------------------------|
| Architecture        |                                                                                                                                                       |
| Structures          | 5AA5 ( <i>Ralstonia eutropha</i> , 2.5 Å resolution, active)                                                                                          |
| Subunits            | 3?                                                                                                                                                    |
| Subunit description | HhyL (hydrogenase large subunit)<br>HhyS (hydrogenase small subunit) HhyE (putative iron-sulfur protein and proposed physiological electron acceptor) |
| Catalytic site      | [NiFe]-centre                                                                                                                                         |
| FeS clusters        | Proximal: 3Cys1Asp[4Fe4S]<br>Medial: 4Cys[4Fe4S]<br>Distal: 3Cys1His[4Fe4S]                                                                           |

**Important Notes**

The *Robiginitalea biformata* and *Sulfolobus islandicus* enzymes are relatively to distantly related to the main group. No studies have yet tested whether these enzymes have a H<sub>2</sub>-scavenging role like other Group 1h [NiFe]-hydrogenases. They may instead represent founding members of a functionally-distinct lineage.

| Sequences in this class |                                         |                   |                |                  |                      |                              |                      |                                     |                                |
|-------------------------|-----------------------------------------|-------------------|----------------|------------------|----------------------|------------------------------|----------------------|-------------------------------------|--------------------------------|
| NCBI Accession          | Organism                                | Hydrogenase Class | Phylum         | Order            | Activity (Predicted) | Oxygen Tolerance (Predicted) | Subunits (Predicted) | Metal Centres (Predicted)           | Accessory Subunits (Predicted) |
| WP_014267363.1          | <i>Granulicella mallensis</i>           | [NiFe] Group 1h   | Acidobacteria  | Acidobacteriales | Aerobic Uptake       | Tolerant                     | 3                    | [NiFe]-centre, 3 x [4Fe4S] clusters | [FeS] protein                  |
| WP_011688202.1          | <i>Soilbacter usitatus</i>              | [NiFe] Group 1h   | Acidobacteria  | Soilbacteriales  | Aerobic Uptake       | Tolerant                     | 3                    | [NiFe]-centre, 3 x [4Fe4S] clusters | [FeS] protein                  |
| WP_021597135.1          | <i>Actinomadura madurae</i>             | [NiFe] Group 1h   | Actinobacteria | Actinomycetales  | Aerobic Uptake       | Tolerant                     | 3                    | [NiFe]-centre, 3 x [4Fe4S] clusters | [FeS] protein                  |
| WP_026402909.1          | <i>Actinomadura rifamycinii</i>         | [NiFe] Group 1h   | Actinobacteria | Actinomycetales  | Aerobic Uptake       | Tolerant                     | 3                    | [NiFe]-centre, 3 x [4Fe4S] clusters | [FeS] protein                  |
| WP_018330638.1          | <i>Actinomycetospora chiangmaiensis</i> | [NiFe] Group 1h   | Actinobacteria | Actinomycetales  | Aerobic Uptake       | Tolerant                     | 3                    | [NiFe]-centre, 3 x [4Fe4S] clusters | [FeS] protein                  |
| WP_007735075.1          | <i>Rhodococcus qingshengii</i>          | [NiFe] Group 1h   | Actinobacteria | Actinomycetales  | Aerobic Uptake       | Tolerant                     | 3                    | [NiFe]-centre, 3 x [4Fe4S] clusters | [FeS] protein                  |
| WP_003935326.1          | <i>Rhodococcus ruber</i>                | [NiFe] Group 1h   | Actinobacteria | Actinomycetales  | Aerobic Uptake       | Tolerant                     | 3                    | [NiFe]-centre, 3 x [4Fe4S] clusters | [FeS] protein                  |
| WP_005443931.1          | <i>Saccharomonospora azurea</i>         | [NiFe] Group 1h   | Actinobacteria | Actinomycetales  | Aerobic Uptake       | Tolerant                     | 3                    | [NiFe]-centre, 3 x [4Fe4S] clusters | [FeS] protein                  |

« 1 2 3 »

## Literature

### Genetics:

- Berney, M., Greening, C., Hards, K., Collins, D., and Cook, G.M. (2014) Three different [NiFe] hydrogenases confer metabolic flexibility in the obligate aerobic *Mycobacterium smegmatis*. *Environ. Microbiol.* **16**: 318-330.
- Constant, P., Chowdhury, S.P., Hesse, L., and Conrad, R. (2011) Co-localization of atmospheric H<sub>2</sub> oxidation activity and high affinity H<sub>2</sub>-oxidizing bacteria in non-axenic soil and sterile soil amended with *Streptomyces* sp. PCB7. *Soil Biol. Biochem.* **43**: 1888-1893.
- Constant, P., Chowdhury, S.P., Hesse, L., Pratscher, J., and Conrad, R. (2011) Genome data mining and soil survey for the novel group 5 [NiFe]-hydrogenase to explore the diversity and ecological importance of presumptive high-affinity H<sub>2</sub>-oxidizing bacteria. *Appl. Environ. Microbiol.* **77**: 6027-6035.
- Greening, C., Biswas, A., Carere, C.R., Jackson, C.J., Taylor, M.C., Stott, M.B., Cook, G.M., and Morales, S.E. (2016) Genomic and metagenomic surveys of hydrogenase distribution indicate H<sub>2</sub> is a widely utilised energy source for microbial growth and survival. *ISME J.* **10**: 761-777.
- Khdir, M., Hesse, L., Popa, M.E., Quiza, L., Lalonde, I., Meredith, L.K., Röckmann, T., and Constant, P. (2015) Soil carbon content and relative abundance of high affinity H<sub>2</sub>-oxidizing bacteria predict atmospheric H<sub>2</sub> soil uptake activity better than soil microbial community composition. *Soil Biol. Biochem.* **85**: 1-9.

### Physiology:

- Berney, M., Greening, C., Conrad, R., Jacobs, W.R., and Cook, G.M. (2014) An obligately aerobic soil bacterium activates fermentative hydrogen production to survive reductive stress during hypoxia. *Proc. Natl. Acad. Sci. U. S. A.* **111**: 11479-11484.
- Constant, P., Chowdhury, S.P., Pratscher, J., and Conrad, R. (2010) Streptomyces contributing to atmospheric molecular hydrogen soil uptake are widespread and encode a putative high-affinity [NiFe]-hydrogenase. *Environ. Microbiol.* **12**: 821-829.

1 **Table S1.** Hydrogenase sequences where there is disagreement between  
2 classification by SSN and *k*-NN methods. These sequences represent six out of the  
3 total 3248 sequences analyzed, i.e. 0.0018%.

4

| NCBI Accession | Organism                       | <i>k</i> -NN Classification | SSN Classification |
|----------------|--------------------------------|-----------------------------|--------------------|
| WP_027414715.1 | Aneurinibacillus terranovensis | [NiFe] Group 1e             | [NiFe] Group 1d    |
| WP_027358538.1 | Desulforegula conservatrix     | [NiFe] Group 3d             | [NiFe] Group 3c    |
| WP_012532312.1 | Geobacter bemidjiensis         | [NiFe] Group 3d             | [NiFe] Group 3c    |
| WP_012469611.1 | Geobacter lovleyi              | [NiFe] Group 3d             | [NiFe] Group 3c    |
| WP_004512544.1 | Geobacter metallireducens      | [NiFe] Group 3d             | [NiFe] Group 3c    |
| WP_015839165.1 | Geobacter sp. M21              | [NiFe] Group 3d             | [NiFe] Group 3c    |

5

6

7 **Dataset S1.** Excel spreadsheet listing the sequence, taxonomy, and hydrogenase  
8 class of all 3248 hydrogenase catalytic subunit sequences listed in HydDB

9
